# Supplementary material
Source: MDPI journal article supplement (https://www.mdpi.com/2073-4395/13/4/992)
Supplement: s1 [file s1]

**Table S1.** List of *HIR*, *EDS1* and *PAD4* genes identified in *Coffea arabica*, *C. canephora*, *C. eugenoides* genomes and HdT transcriptome and their corresponding gene, open reading frame (ORF) and protein size.

| Genes               |              | <i>C. arabica</i>            |                      | <i>C. canephora</i> | <i>C. eugenoides</i> | <i>HdT</i>                   |
|---------------------|--------------|------------------------------|----------------------|---------------------|----------------------|------------------------------|
|                     |              | chr. c                       | chr. e               |                     |                      |                              |
| <b><i>HIR1</i></b>  | GeneID       | 113716961                    | 113717595            | Cc11_g13450         | 113754397            | 4974<br>4975                 |
|                     | Gene (bp)    | 3723                         | 3621                 | 2614                | 3611                 | Nd                           |
|                     | ORF (bp)     | 1768<br>1679<br>1239<br>1182 | 1699<br>1352<br>1880 | 1011                | 1671                 | 1419<br>1379                 |
|                     | Protein (aa) | 286                          | 286                  | 336                 | 286                  | 286                          |
| <b><i>HIR2</i></b>  | GeneID       | 113740361                    | 113742674            | Cc11_g13450         | 113767564            | 1977<br>1978<br>1979<br>1980 |
|                     | Gene (bp)    | 3205                         | 3231                 | 2614                | 3119                 | Nd                           |
|                     | ORF (bp)     | 1182<br>1291                 | 1203                 | 1011                | 1091                 | 1220<br>1220<br>1301<br>1301 |
|                     | Protein (aa) | 286                          | 286                  | 336                 | 286                  | 286                          |
| <b><i>HIR3</i></b>  | GeneID       | 113725125                    | 113730151            | Cc04_g15530         | 113762209            | 9472                         |
|                     | Gene (bp)    | 3532                         | 3559                 | 1698                | 3545                 | Nd                           |
|                     | ORF (bp)     | 1265                         | 1298                 | 861                 | 1282                 | 1289                         |
|                     | Protein (aa) | 291                          | 291                  | 286                 | 291                  | 291                          |
| <b><i>HIR4</i></b>  | GeneID       | 113700021                    | -                    | Cc07_g03000         | 113753487            | 9636                         |
|                     | Gene (bp)    | 3225                         | -                    | 1820                | 3245                 | Nd                           |
|                     | ORF (bp)     | 1295<br>1286                 | -                    | 873                 | 1298<br>1466<br>1457 | 1243                         |
|                     | Protein (aa) | 290<br>290                   | -                    | 291                 | 291<br>290<br>300    | 290                          |
| <b><i>EDS1a</i></b> | GeneID       | 113740411                    | 113742236            | Cc04_g16220         | 113767316            | 3670                         |
|                     | Gene (bp)    | 2589                         | 2622                 | 7154                | 2520                 | Nd                           |
|                     | ORF (bp)     | 2318                         | 2344                 | 3216                | 1821                 |                              |
|                     | Protein (bp) | 606                          | 606                  | 1071                | 606                  |                              |
| <b><i>EDS1b</i></b> | GeneID       | 113738521                    | -                    | -                   | -                    | -                            |
|                     | Gene (bp)    | 2589                         | -                    | -                   | -                    | -                            |
|                     | ORF (bp)     | 2334                         | -                    | -                   | -                    | -                            |
|                     | Protein (aa) | 606                          | -                    | -                   | -                    | -                            |
| <b><i>PAD4</i></b>  | GeneID       | 113698404                    | -                    | Cc02_g33890         | -                    | -                            |
|                     | Gene (bp)    | 2120                         | -                    | 629                 | -                    | -                            |
|                     | ORF (bp)     | 908<br>899<br>946            | -                    | 441                 | -                    | -                            |
|                     | Protein (aa) | 122<br>119<br>138            | -                    | 146                 | -                    | -                            |
| <b><i>PAD4</i></b>  | GeneID       | -                            | -                    | Cc02_g33900         | 113777610            | 03754<br>03755               |
|                     | Gene (bp)    | -                            | -                    | 1826                | 8437                 | nd                           |
|                     | ORF (bp)     | -                            | -                    | 1545                | 2324                 | 2311<br>2317                 |
|                     | Protein (aa) | -                            | -                    | 514                 | 632                  | 666<br>663                   |
