# Supplementary material
Source: MDPI journal article supplement (https://www.mdpi.com/2073-4395/13/4/992)
Supplement: s1 [file s1]

**Figure S1.** Multiple sequence alignment of *HIR1*, *HIR2*, *HIR3*, *HIR4*, *EDS1* and *PAD4* genes of *Coffea* spp. Alignments were carried out using T-coffee server (<http://tcoffee.crg.cat>). Nucleotide and amino acid differences are encircled by orange boxes, the first ATG by a yellow box and the STOP codon by a blue box. Genes appear in the following order:

1. [HIR1](#);
2. [HIR2](#);
3. [HIR3](#);
4. [HIR4](#);
5. [EDS1](#);
6. [PAD4](#).

**Figure S2. A.** Motifs identified by the MEME algorithm (<https://meme-suite.org/meme/>) using complete amino acids sequences of 25 HIR genes from *Coffea* spp. and *Arabidopsis thaliana*. Motifs are numbered according with their position in the protein sequences. **B.** Distribution of the conserved motifs identified in MEME algorithm in a scheme representing a generic HIR protein. Different motifs are indicated by different colors and numbered 1 to 7 corresponding to the numbers in the table above.

**Figure S3.** Phylogenetic analysis of putative *Coffea* spp. EDS1 and PAD4 with AtEDS1 and AtPAD4 and orthologs from a select group of species.

**HDT** M2043762 T-AATCAGAAAGTCTACATGGATAGCCATCTGCGTGTCTTAAACCTTCGACCTTCCTCGTGTGCCCCCAAGCAAAAAA  
M2043761 TAAATCTAATGAGTAAAGCATTCTGCTTTTATAAAGAAA  
**Ca<sub>e</sub>** XM\_027241529 GAATATCAGAAAGTAAAGCATTCTGCTTTTATAAAGT  
XM\_027241530 TAAATCTAATGAGTAAAGCATTCTGCTTTTATAAAGT  
**Ca<sub>e</sub>** XM\_027241531 GAATATCAGAAAGTAAAGCATTCTGCTTTTATAAAGT  
XM\_027241532 TAAATCTAATGAGTAAAGCATTCTGCTTTTATAAAGT  
XM\_027241533 TAAATCTAATGAGTCTACATGGATAGCCATCTGCTTTTATAAAGT  
XM\_027242349 T-AATCAGAAAGTCTACATGGATAGCCATCTGCTTTTATAAAGT  
XM\_027242350 T-AATCAGAAAGTCTACATGGATAGCCATCTGCTTTTATAAAGT  
\* \* \* \* \*

**B - Coffee HIR1 Protein sequences**

**HDT** M2043762 HQDALGCIQVQSTVAIKRIFKPKGNFDVLEPGCHVPMCVGSGQAGGILSLRWQLDICKETKTKNFPTVVA  
M2043761 HQDALGCIQVQSTVAIKRIFKPKGNFDVLEPGCHVPMCVGSGQAGGILSLRWQLDICKETKTKNFPTVVA  
**Ca<sub>e</sub>** XP\_027097331 HQDALGCIQVQSTVAIKRIFKPKGNFDVLEPGCHVPMCVGSGQAGGILSLRWQLDICKETKTKNFPTVVA  
XP\_027097332 HQDALGCIQVQSTVAIKRIFKPKGNFDVLEPGCHVPMCVGSGQAGGILSLRWQLDICKETKTKNFPTVVA  
XP\_027097333 HQDALGCIQVQSTVAIKRIFKPKGNFDVLEPGCHVPMCVGSGQAGGILSLRWQLDICKETKTKNFPTVVA  
**Ca<sub>e</sub>** XP\_027098149 HQDALGCIQVQSTVAIKRIFKPKGNFDVLEPGCHVPMCVGSGQAGGILSLRWQLDICKETKTKNFPTVVA  
XP\_027098150 HQDALGCIQVQSTVAIKRIFKPKGNFDVLEPGCHVPMCVGSGQAGGILSLRWQLDICKETKTKNFPTVVA  
XP\_027098151 HQDALGCIQVQSTVAIKRIFKPKGNFDVLEPGCHVPMCVGSGQAGGILSLRWQLDICKETKTKNFPTVVA  
\* \* \* \* \*

**HDT** M2043762 HXINIAASRLREAAASEKAAEKILQLKRAEGEAAKYLGLGILARQQAIVDGLRSLVGFASNVPGTSSKVDHMDVLV  
M2043761 HXINIAASRLREAAASEKAAEKILQLKRAEGEAAKYLGLGILARQQAIVDGLRSLVGFASNVPGTSSKVDHMDVLV  
**Ca<sub>e</sub>** XP\_027097331 HXINIAASRLREAAASEKAAEKILQLKRAEGEAAKYLGLGILARQQAIVDGLRSLVGFASNVPGTSSKVDHMDVLV  
XP\_027097332 HXINIAASRLREAAASEKAAEKILQLKRAEGEAAKYLGLGILARQQAIVDGLRSLVGFASNVPGTSSKVDHMDVLV  
XP\_027097333 HXINIAASRLREAAASEKAAEKILQLKRAEGEAAKYLGLGILARQQAIVDGLRSLVGFASNVPGTSSKVDHMDVLV  
**Ca<sub>e</sub>** XP\_027098149 HXINIAASRLREAAASEKAAEKILQLKRAEGEAAKYLGLGILARQQAIVDGLRSLVGFASNVPGTSSKVDHMDVLV  
XP\_027098150 HXINIAASRLREAAASEKAAEKILQLKRAEGEAAKYLGLGILARQQAIVDGLRSLVGFASNVPGTSSKVDHMDVLV  
XP\_027098151 HXINIAASRLREAAASEKAAEKILQLKRAEGEAAKYLGLGILARQQAIVDGLRSLVGFASNVPGTSSKVDHMDVLV  
\* \* \* \* \*

HDT  
MZ043761 MNEINAAASRLREAAASEKABADKILQIKRABGEAEAKYLACGLGARQRO  
XP 027097330 MNKINAAASHLHPAASEKKAHAKILQIKRABGEAEAKYLACGLGARQRO

|                 |              |                                                                                 |                                                                |                        |
|-----------------|--------------|---------------------------------------------------------------------------------|----------------------------------------------------------------|------------------------|
| HDT             | M2043762     | MGDGLCIGQVDSVTAIKENFGKFDVLEGGCCHVPCVCGSGDGLGGLSLRVQLDLDKCTTKTKVNVPTVVA          | QYRALAKAKSDAYYRLSNTKDIQYAVYDVVRASVPKSLDKVFKPKQNKITAKAVRRLIKAMH | GYEVTTLVDTLVDIEPQVQVKA |
|                 | M2043761     | MGDGLCIGQVDSVTAIKENFGKFDVLEGGCCHVPCVCGSGDGLGGLSLRVQLDLDKCTTKTKVNVPTVVA          | QYRALAKAKSDAYYRLSNTKDIQYAVYDVVRASVPKSLDKVFKPKQNKITAKAVRRLIKAMH | GYEVTTLVDTLVDIEPQVQVKA |
|                 | XP_027097330 | MGDGLCIGQVDSVTAIKENFGKFDVLEGGCCHVPCVCGSGDGLGGLSLRVQLDLDKCTTKTKVNVPTVVA          | QYRALAKAKSDAYYRLSNTKDIQYAVYDVVRASVPKSLDKVFKPKQNKITAKAVRRLIKAMH | GYEVTTLVDTLVDIEPQVQVKA |
|                 | XP_027097331 | MGDGLCIGQVDSVTAIKENFGKFDVLEGGCCHVPCVCGSGDGLGGLSLRVQLDLDKCTTKTKVNVPTVVA          | QYRALAKAKSDAYYRLSNTKDIQYAVYDVVRASVPKSLDKVFKPKQNKITAKAVRRLIKAMH | GYEVTTLVDTLVDIEPQVQVKA |
|                 | XP_027097332 | MGDGLCIGQVDSVTAIKENFGKFDVLEGGCCHVPCVCGSGDGLGGLSLRVQLDLDKCTTKTKVNVPTVVA          | QYRALAKAKSDAYYRLSNTKDIQYAVYDVVRASVPKSLDKVFKPKQNKITAKAVRRLIKAMH | GYEVTTLVDTLVDIEPQVQVKA |
| Ca <sub>c</sub> | XP_027097331 | MGDGLCIGQVDSVTAIKENFGKFDVLEGGCCHVPCVCGSGDGLGGLSLRVQLDLDKCTTKTKVNVPTVVA          | QYRALAKAKSDAYYRLSNTKDIQYAVYDVVRASVPKSLDKVFKPKQNKITAKAVRRLIKAMH | GYEVTTLVDTLVDIEPQVQVKA |
|                 | XP_027097332 | MGDGLCIGQVDSVTAIKENFGKFDVLEGGCCHVPCVCGSGDGLGGLSLRVQLDLDKCTTKTKVNVPTVVA          | QYRALAKAKSDAYYRLSNTKDIQYAVYDVVRASVPKSLDKVFKPKQNKITAKAVRRLIKAMH | GYEVTTLVDTLVDIEPQVQVKA |
|                 | XP_027097333 | MGDGLCIGQVDSVTAIKENFGKFDVLEGGCCHVPCVCGSGDGLGGLSLRVQLDLDKCTTKTKVNVPTVVA          | QYRALAKAKSDAYYRLSNTKDIQYAVYDVVRASVPKSLDKVFKPKQNKITAKAVRRLIKAMH | GYEVTTLVDTLVDIEPQVQVKA |
|                 | XP_027098149 | MGDGLCIGQVDSVTAIKENFGKFDVLEGGCCHVPCVCGSGDGLGGLSLRVQLDLDKCTTKTKVNVPTVVA          | QYRALAKAKSDAYYRLSNTKDIQYAVYDVVRASVPKSLDKVFKPKQNKITAKAVRRLIKAMH | GYEVTTLVDTLVDIEPQVQVKA |
|                 | XP_027098150 | MGDGLCIGQVDSVTAIKENFGKFDVLEGGCCHVPCVCGSGDGLGGLSLRVQLDLDKCTTKTKVNVPTVVA          | QYRALAKAKSDAYYRLSNTKDIQYAVYDVVRASVPKSLDKVFKPKQNKITAKAVRRLIKAMH | GYEVTTLVDTLVDIEPQVQVKA |
| Ca <sub>e</sub> | XP_027098151 | MGDGLCIGQVDSVTAIKENFGKFDVLEGGCCHVPCVCGSGDGLGGLSLRVQLDLDKCTTKTKVNVPTVVA          | QYRALAKAKSDAYYRLSNTKDIQYAVYDVVRASVPKSLDKVFKPKQNKITAKAVRRLIKAMH | GYEVTTLVDTLVDIEPQVQVKA |
|                 | *****        | *****                                                                           | *****                                                          | *****                  |
|                 | M2043762     | MHEINAAASRLREAASFEAKADKILQIKRABGEAEAKYLGLGIARQQAIVDGLRDSVLGPAASNVPGTSSKDVMDNVLT | QYDTMKRIGASSSSSEVFPIHGPGAVDIAQCRDGLLQGRIDEV                    |                        |
|                 | M2043761     | MHEINAAASRLREAASFEAKADKILQIKRABGEAEAKYLGLGIARQQAIVDGLRDSVLGPAASNVPGTSSKDVMDNVLT | QYDTMKRIGASSSSSEVFPIHGPGAVDIAQCRDGLLQGRIDEV                    |                        |
|                 | XP_027097330 | MHEINAAASRLREAASFEAKADKILQIKRABGEAEAKYLGLGIARQQAIVDGLRDSVLGPAASNVPGTSSKDVMDNVLT | QYDTMKRIGASSSSSEVFPIHGPGAVDIAQCRDGLLQGRIDEV                    |                        |
| Ca <sub>c</sub> | XP_027097331 | MHEINAAASRLREAASFEAKADKILQIKRABGEAEAKYLGLGIARQQAIVDGLRDSVLGPAASNVPGTSSKDVMDNVLT | QYDTMKRIGASSSSSEVFPIHGPGAVDIAQCRDGLLQGRIDEV                    |                        |
|                 | XP_027097332 | MHEINAAASRLREAASFEAKADKILQIKRABGEAEAKYLGLGIARQQAIVDGLRDSVLGPAASNVPGTSSKDVMDNVLT | QYDTMKRIGASSSSSEVFPIHGPGAVDIAQCRDGLLQGRIDEV                    |                        |
|                 | XP_027097333 | MHEINAAASRLREAASFEAKADKILQIKRABGEAEAKYLGLGIARQQAIVDGLRDSVLGPAASNVPGTSSKDVMDNVLT | QYDTMKRIGASSSSSEVFPIHGPGAVDIAQCRDGLLQGRIDEV                    |                        |
|                 | XP_027098149 | MHEINAAASRLREAASFEAKADKILQIKRABGEAEAKYLGLGIARQQAIVDGLRDSVLGPAASNVPGTSSKDVMDNVLT | QYDTMKRIGASSSSSEVFPIHGPGAVDIAQCRDGLLQGRIDEV                    |                        |
|                 | XP_027098150 | MHEINAAASRLREAASFEAKADKILQIKRABGEAEAKYLGLGIARQQAIVDGLRDSVLGPAASNVPGTSSKDVMDNVLT | QYDTMKRIGASSSSSEVFPIHGPGAVDIAQCRDGLLQGRIDEV                    |                        |
| Ca <sub>e</sub> | XP_027098151 | MHEINAAASRLREAASFEAKADKILQIKRABGEAEAKYLGLGIARQQAIVDGLRDSVLGPAASNVPGTSSKDVMDNVLT | QYDTMKRIGASSSSSEVFPIHGPGAVDIAQCRDGLLQGRIDEV                    |                        |
|                 | *****        | *****                                                                           | *****                                                          | *****                  |

**HDT** M2043763 MNI1AAARLRPLVAANEAEAEAKKLLQIKRAEAGEAEAKYLSGNGIARQQAIVDGLRDSVLGFSVVPVPTTAKDVDMXVLVLYQYFDCKMEGAASKSSAVFTIHGPGAVRQVATQIRDGLQAS **SSS**  
M2043764 MNI1AAARLRPLVAANRKAARFKKLLQIKRAEAGEAEAKYLSGNGIARQQAIVDGLRDSVLGFSVVPVPTTAKDVDMXVLVLYQYFDCKMEGAASKSSAVFTIHGPGAVRQVATQIRDGLQAS **SSS**  
**Ca<sub>e</sub>** M2043765 MNI1AAARLRPLVAANEAEAEAKKLLQIKRAEAGEAEAKYLSGNGIARQQAIVDGLRDSVLGFSVVPVPTTAKDVDMXVLVLYQYFDCKMEGAASKSSAVFTIHGPGAVRQVATQIRDGLQAS **EHL**  
**Ca<sub>c</sub>** M2043766 MNI1AAARLRPLVAANRKAARFKKLLQIKRAEAGEAEAKYLSGNGIARQQAIVDGLRDSVLGFSVVPVPTTAKDVDMXVLVLYQYFDCKMEGAASKSSAVFTIHGPGAVRQVATQIRDGLQAS **EH**  
**Ca<sub>c</sub>** XP\_027126372 MNI1AAARLRPLVAANEAEAEAKKLLQIKRAEAGEAEAKYLSGNGIARQQAIVDGLRDSVLGFSVVPVPTTAKDVDMXVLVLYQYFDCKMEGAASKSSAVFTIHGPGAVRQVATQIRDGLQAS **SSS**  
XP\_027123774 MNI1AAARLRPLVAANRKAARFKKLLQIKRAEAGEAEAKYLSGNGIARQQAIVDGLRDSVLGFSVVPVPTTAKDVDMXVLVLYQYFDCKMEGAASKSSAVFTIHGPGAVRQVATQIRDGLQAS **RHI**  
XP\_027123775 MNI1AAARLRPLVAANEAEAEAKKLLQIKRAEAGEAEAKYLSGNGIARQQAIVDGLRDSVLGFSVVPVPTTAKDVDMXVLVLYQYFDCKMEGAASKSSAVFTIHGPGAVRQVATQIRDGLQAS **EHL**  
\*\*\*\*\*



HDT = MZ043768 -----

[illegible]

### B - Coffea *HIR4* Protein sequences

**HDT** M2043768 -----KGMILLCCQAQDGSVAITEKFGKFOVLEPGCHFLPCLCGSQIAGTSLRLQQLDWRCEHTKKNQVPTVASIQYRALAKASAFYRCSHTTQIATYVPTVIRTPFLNLDCAFQKRIAKAVDEDLKASMSYGYIQTLLVD  
**Ca<sub>c</sub>** XM 027220426 -----KGMILLCCQAQDGSVAITEKFGKFOVLEPGCHFLPCLCGSQIAGTSLRLQQLDWRCEHTKKNQVPTVASIQYRALAKASAFYRCSHTTQIATYVPTVIRTPFLNLDCAFQKRIAKAVDEDLKASMSYGYIQTLLVD  
 XM 027220425 -----KGMILLCCQAQDGSVAITEKFGKFOVLEPGCHFLPCLCGSQIAGTSLRLQQLDWRCEHTKKNQVPTVASIQYRALAKASAFYRCSHTTQIATYVPTVIRTPFLNLDCAFQKRIAKAVDEDLKASMSYGYIQTLLVD  
**Ce** XM 027297648 -----KGMILLCCQAQDGSVAITEKFGKFOVLEPGCHFLPCLCGSQIAGTSLRLQQLDWRCEHTKKNQVPTVASIQYRALAKASAFYRCSHTTQIATYVPTVIRTPFLNLDCAFQKRIAKAVDEDLKASMSYGYIQTLLVD  
**Cc** XM 027297650 -----KGMILLCCQAQDGSVAITEKFGKFOVLEPGCHFLPCLCGSQIAGTSLRLQQLDWRCEHTKKNQVPTVASIQYRALAKASAFYRCSHTTQIATYVPTVIRTPFLNLDCAFQKRIAKAVDEDLKASMSYGYIQTLLVD  
 Ce07\_g03000 -----KGMILLCCQAQDGSVAITEKFGKFOVLEPGCHFLPCLCGSQIAGTSLRLQQLDWRCEHTKKNQVPTVASIQYRALAKASAFYRCSHTTQIATYVPTVIRTPFLNLDCAFQKRIAKAVDEDLKASMSYGYIQTLLVD

**HDT** M2043768 -----KGMILLCCQAQDGSVAITEKFGKFOVLEPGCHFLPCLCGSQIAGTSLRLQQLDWRCEHTKKNQVPTVASIQYRALAKASAFYRCSHTTQIATYVPTVIRTPFLNLDCAFQKRIAKAVDEDLKASMSYGYIQTLLVD  
**Ca<sub>c</sub>** XM 027220426 -----KGMILLCCQAQDGSVAITEKFGKFOVLEPGCHFLPCLCGSQIAGTSLRLQQLDWRCEHTKKNQVPTVASIQYRALAKASAFYRCSHTTQIATYVPTVIRTPFLNLDCAFQKRIAKAVDEDLKASMSYGYIQTLLVD  
 XM 027220425 -----KGMILLCCQAQDGSVAITEKFGKFOVLEPGCHFLPCLCGSQIAGTSLRLQQLDWRCEHTKKNQVPTVASIQYRALAKASAFYRCSHTTQIATYVPTVIRTPFLNLDCAFQKRIAKAVDEDLKASMSYGYIQTLLVD  
**Ce** XM 027297648 -----KGMILLCCQAQDGSVAITEKFGKFOVLEPGCHFLPCLCGSQIAGTSLRLQQLDWRCEHTKKNQVPTVASIQYRALAKASAFYRCSHTTQIATYVPTVIRTPFLNLDCAFQKRIAKAVDEDLKASMSYGYIQTLLVD  
**Cc** XM 027297650 -----KGMILLCCQAQDGSVAITEKFGKFOVLEPGCHFLPCLCGSQIAGTSLRLQQLDWRCEHTKKNQVPTVASIQYRALAKASAFYRCSHTTQIATYVPTVIRTPFLNLDCAFQKRIAKAVDEDLKASMSYGYIQTLLVD  
 Ce07\_g03000 -----KGMILLCCQAQDGSVAITEKFGKFOVLEPGCHFLPCLCGSQIAGTSLRLQQLDWRCEHTKKNQVPTVASIQYRALAKASAFYRCSHTTQIATYVPTVIRTPFLNLDCAFQKRIAKAVDEDLKASMSYGYIQTLLVD

Formin-  
Domain

```

-MALGDSIGLKEELIK
-MALGDSIGLKEELIK
-MALGDSIGLKEELIK
-MALGDTIGLKEELIK
-MALGDTIGLKEELIK
KMALGDTIGLKEELIK
*****:*****

```

## Coffea PAD4 Protein sequences

**Ca<sub>c</sub>** [ XP\_027074015 MEAEASSFECSEMLATLLASTPLLEESWKLCGQANAEAPQSYGTKQMGHVITYIAFSGIQMLAGLDPSCSNLVPIESSANG  
 XP\_027074016 MEAEASSFECSEMLATLLASTPLLEESWKLCGQANAEAPQSYGTKQMGHVITYIAFSGIQMLAGLDPSCSNLVPIESSANG  
 XP\_027074017 MEAEASSFECSEMLATLLASTPLLEESWKLCGQANAEAPQSYGTKQMGHVITYIAFSGIQMLAGLDPSCSNLVPIESSANG  
**Cc** — Cc02\_g33890 MEAEASSFECSEMLATLLASTPLLEESWKLCGQANAEAPQSYGTKQMGHVITYIAFSGIQMLAGLDPSCSNLVPIESSANG  
 \*\*\*\*\*

**Ca<sub>c</sub>** [ XP\_027074015 LFSSLHRHGE GEEPVMVHAGLLHLFLSFYSSPIFQNVCNGLRIQIQFILALKRRR-----LG  
 XP\_027074016 LFSSLHRHGE GEEPVMVHAGLLHLFLSFYSSPIFQNVN--GQ---V-----S  
 XP\_027074017 LFSSLHRHGE GEEPVMVHAGLLHLFLSFYSSPIFQNV-----S  
**Cc** — Cc02\_g33890 LFSSLHRHGE GEEPVMVHAGLLHLFLSFYSSPIFQNDERRLTHEARVLLGRSGGRAVAGGTVLIG  
 \*\*\*\*\*

**HDT** [ MZ043770 MEAEASSFECSEMLATLLASTPLLEESWKLCGQANAEAPQSYGTKQMGHVSYVAFSGIQMLAGLDPSCSNLVPIESSANG  
 MZ043771 MEAEASSFECSEMLATLLASTPLLEESWKLCGQANAEAPQSYGTKQMGHVSYVAFSGIQMLAGLDPSCSNLVPIESSANG  
**Cc** — Cc02\_g33900 M-----  
**Ce** — XP\_027178560 MEAEASSFECSEMLATLLASTPLLEESWKLCGQANAEAPQSYGTKQMGHVSYVAFSGIQMLAGLDPSCSNLVPIESSANG  
 \*

**HDT** [ MZ043770 LFSSLHRHGE GEEPVMVHAGLLHLFLSFYSSPIFQNMREITSNSKSVVFTGHSVGGTVASLSALWFLSCLQSLPSSFSV  
 MZ043771 LFSSLHRHGE GEEPVMVHAGLLHLFLSFYSSPIFQNMREITSNSKSVVFTGHSVGGTVASLSALWFLSCLQSLPSSFSV  
**Cc** — Cc02\_g33900 -----QMREITSNSKSVVFTGHSVGGTVASLSALWFLSCLQSLPSSFSV  
**Ce** — XP\_027178560 LFSSLHRHGE GEEPVMVHAGLLHLFLSFYSSPIFQNMREITSNSKSVVFTGHSVGGTVASLSALWFLSCLQSLPSSFSV  
 \*\*\*\*\*

**HDT** [ MZ043770 ICVTFGSPMLGNESLSKAILQERWGGNFLHVVAQHDIVPRLLFAPSDSLFPYLCFFPFWHSSMSNPSFKQLLAQCPDEM  
 MZ043771 ICVTFGSPMLGNESLSKAILQERWGGNFLHVVAQHDIVPRLLFAPSDSLFPYLCFFPFWHSSMSNPSFKQLLAQCPDEM  
**Cc** — Cc02\_g33900 ICVTFGSPMLGNESLSKAILQERWGGNFLHVVAQHDIVPRLLFAPSDSLFPYLCFFPFWHSSMSNPSFKQLLAQCPDEM  
**Ce** — XP\_027178560 ICVTFGSPMLGNESLSKAILQERWGGNFLHVVAQHDIVPRLLFAPSDSLFPYLCFFPFWHSSMSNPSFKQLLAQCPDEM  
 \*\*\*\*\*

**HDT** [ MZ043770 QAQFLHIVLNSLEALSAGGLNSGQGNLFWPFGSYIFCTSKGSICLDNAVSVIKMLHLM LAKSSPSSSIEDHLNYENYVGQ  
 MZ043771 QAQFLHIVLNSLEALSAGGLNSGQGNLFWPFGSYIFCTSKGSICLDNAVSVIKMLHLM LAKSSPSSSIEDHLNYENYVGQ  
**Cc** — Cc02\_g33900 QAQFLHIVLNSLEALSAGGLNSGQGNLFWPFGSYIFCTSKGSICLDNAVSVIKMLHLM LAKSSPSSSIEDHLNYENYVGQ  
**Ce** — XP\_027178560 QAQFLHIVLNSLEALSAGGLNSGQGNLFWPFGSYIFCTSKGSICLDNAVSVIKMLHLM LAKSSPSSSIEDHLNYENYVGQ  
 \*\*\*\*\*

**HDT** [ MZ043770 VYQWILSSNNFQEGDLPDSSYEVGIALALQSSDITPCEAVSGPAKDCLKAKQMGRTPSLNSANLAIALSKITPLRAQIE  
 MZ043771 VYQWILSSNNFQEGDLPDSSYEVGIALALQSSDITPCEAVSGPAKDCLKAKQMGRTPSLNSANLAIALSKITPLRAQIE  
**Cc** — Cc02\_g33900 VYQWILSSNNFQEGDLPDSSYEVGIALALQSSDITPCEAVSGPAKDCLKAKQMGRTPSLNSANLAIALSKITPLRAQIE  
**Ce** — XP\_027178560 VYQWILSSNNFQEGDLPDSSYEVGIALALQSSDITPCEAVSGPAKDCLKAKQMGRTPSLNSANLAIALSKITPLRAQIE  
 \*\*\*\*\*:\*\*\*\*\*

**HDT** [ MZ043770 WYKATCDDSDQMGYYDSFKRRGASKKNSKVMNMRHKLARFWDVISMLEHNQLPHDFHKRSKWNASQFYKLLVEPLDI  
 MZ043771 WYKATCDDSDQMGYYDSFKRRGASKKNSKVMNMRHKLARFWDVISMLEHNQLPHDFHKRSKWNASQFYKLLVEPLDI  
**Cc** — Cc02\_g33900 WYKATCDDSDQMGYYDSFKRRGASKKNSKVMNMRHKLARFWDVISMLEHNQLPHDFHKRSKWNASQFYKLLVEPLDI  
**Ce** — XP\_027178560 WYKATCDDSDQMGYYDSFKRRGASKKNSKVMNMRHKLARFWDVISMLEHNQLPHDFHKRSKWNASQFYKLLVEPLDI  
 \*\*\*:\*\*\*\*\*:\*\*\*\*\*

**HDT** [ MZ043770 AEYYRSGEHLKKGHYMEHGRERRYKIFDKWWRDRKVEGNPGNSRSKFASLTQDSCFWARVEEARDWLNVRVSEGDTRTQS  
 MZ043771 AEYYRSGEHLKKGHYMEHGRERRYKIFDKWWRDRKVEGNPGNSRSKFASLTQDSCFWARVEEARDWLNVRVSEGDTRTQS  
**Cc** — Cc02\_g33900 AEYYRSGEHLKKGHYMEHGRERRYKIFDKWWRDRKVEGNPGNSRSKFASLTQDSCFWARVEEARDWLNVRVSEGDTRTQS  
**Ce** — XP\_027178560 AEYYRSGEHLKKGHYMEHGRERRYKIFDKWWRDRKVEGNPGNSRSKFASLTQDSCFWARVEEARDWLNVRVSEGDTRTQS  
 \*\*\*\*\*

**HDT** [ MZ043770 LLWENIEKFDQYARGMVD RKEVSIDVLAKNSSYNLFVEEWKDLKSQLQLFPFHPFSLDGGGSSSFDYIVGK  
 MZ043771 LLWENIEKFDQYARGMVD RKEVSIDVLAKNSSYNLFVEEWKDLKSQLQLFPFHPFSLDGGGSSSFTIL---  
**Cc** — Cc02\_g33900 LLWENIEKFDQYARGMVD RKEVSIDVLAKNSSYNLFVEEWKDLKSQLQLFPFHPFSLDGGGSSSFTIL---  
**Ce** — XP\_027178560 LLWENIEKFDQYARGMVD RKEVSIDVLAKNSSYNLFVEEWKDLKSQLQLFPFHPFSLDGGGSSSFDYIVGK  
 \*\*\*\*\*:



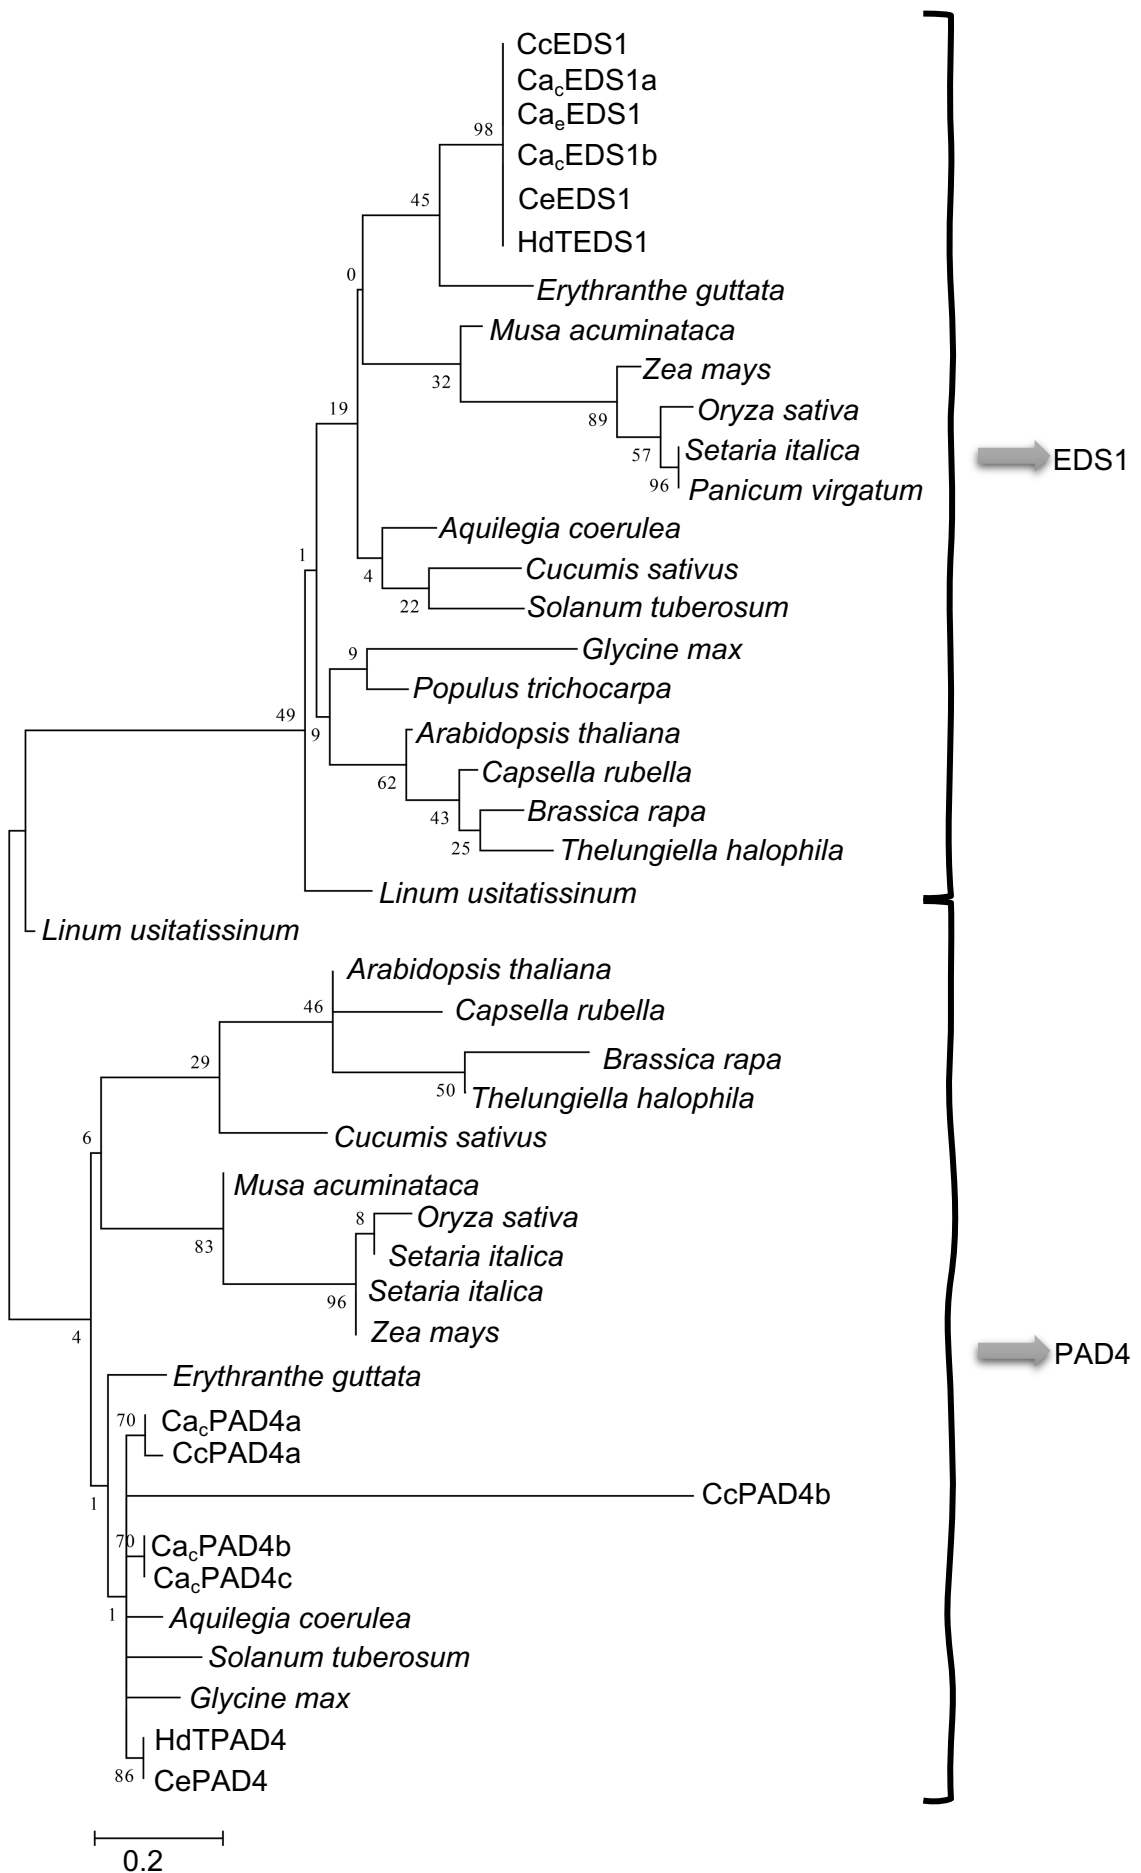

**Figure S3** Phylogenetic analysis of putative *Coffea* spp. EDS1 and PAD4 with AtEDS1 and AtPAD4 and a orthologs from a select group of species.
